# Supplementary material
Source: PubMed Central journal article supplement (PMC4229395)
Supplement: NIHMS624205-supplement-Supp_FigureS2.pdf [file NIHMS624205-supplement-Supp_FigureS2.pdf]

**Figure S2**

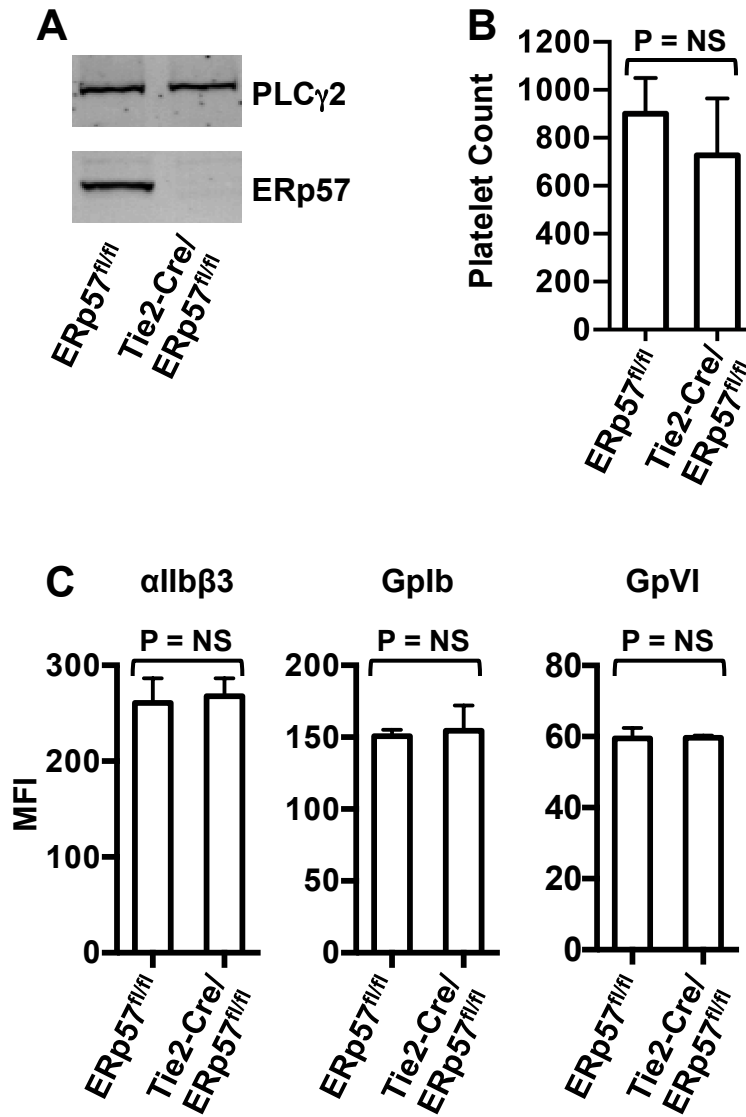

**Supplemental Figure 2.** Characterization of Tie2-Cre/ERp57<sup>fl/fl</sup> platelets. (A) Platelets from Tie2-Cre/ERp57<sup>fl/fl</sup> mice lack ERp57 (with PLCγ2 loading control; 30 μg of protein). Shown is a representative Western blot of platelets performed as described (Wang et al. Blood. 2013;122:3642). (B) Platelet counts in ERp57<sup>fl/fl</sup> and Tie2-Cre/ERp57<sup>fl/fl</sup> mice ±SE (n = 9). (C) Glycoprotein expression in platelets from Tie2-Cre/ERp57<sup>fl/fl</sup> mice compared with ERp57<sup>fl/fl</sup> littermate controls ±SE (n = 4). Mouse platelets were incubated with antibodies to αIIbβ3, GPVI or GPIb and analyzed by flow cytometry. MFI = mean fluorescent intensity.
